# Supplementary material for: Synthesis and Structure of a Ferrocenylsilane-Bridged Bisphosphine
Source: MDPI journal article supplement (doi:10.3390/inorganics10020022), 2022-02-15
Supplement: s1 [file s1]

Supporting Information for

**Synthesis and Structure of a Ferrocenylsilane-bridged Bisphosphine**

Takahiro Sasamori,<sup>1,2,\*</sup> Hiromu Ueno,<sup>3</sup> and Shogo Morisako<sup>1,2</sup>

1. Division of Chemistry, Faculty of Pure and Applied Sciences,  
University of Tsukuba, 1-1-1 Tennoudai, Tsukuba, Ibaraki 305-8571, Japan
2. Tsukuba Research Center for Energy Materials Sciences (TREMS),  
University of Tsukuba, 1-1-1 Tennoudai, Tsukuba, Ibaraki 305-8571, Japan
3. College of Chemistry, School of Science and Engineering, University of Tsukuba,  
1-1-1 Tennoudai, Tsukuba, Ibaraki 305-8571, Japan

E-mail: sasamori@chem.tsukuba.ac.jp

Tel, Fax: +81-29-853-4412

## Contents

|                                                      |     |
|------------------------------------------------------|-----|
| 1. NMR spectra of the newly obtained compounds       | S3  |
| 2. Crystallographic data                             | S9  |
| 3. Coordinates of theoretically optimized structures | S10 |
| 4. References                                        | S22 |

# 1. NMR spectra of the newly obtained compounds.

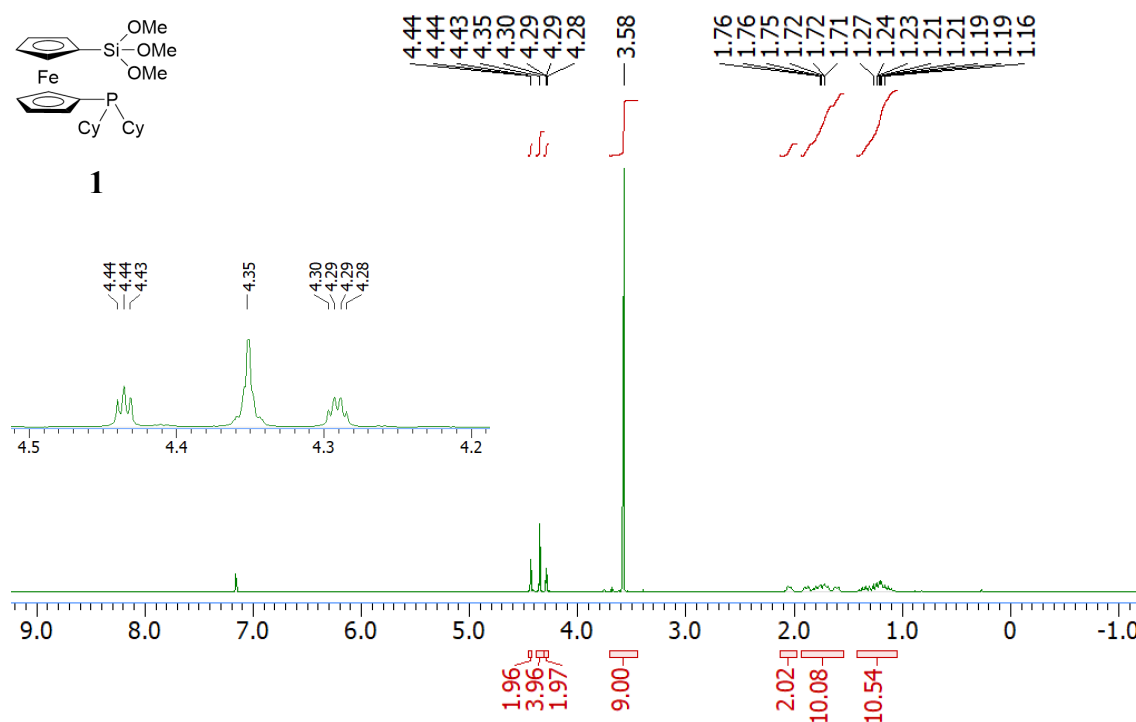

**Figure S1.** <sup>1</sup>H NMR spectrum (400 MHz) of **1** in C<sub>6</sub>D<sub>6</sub> drawn in ppm.

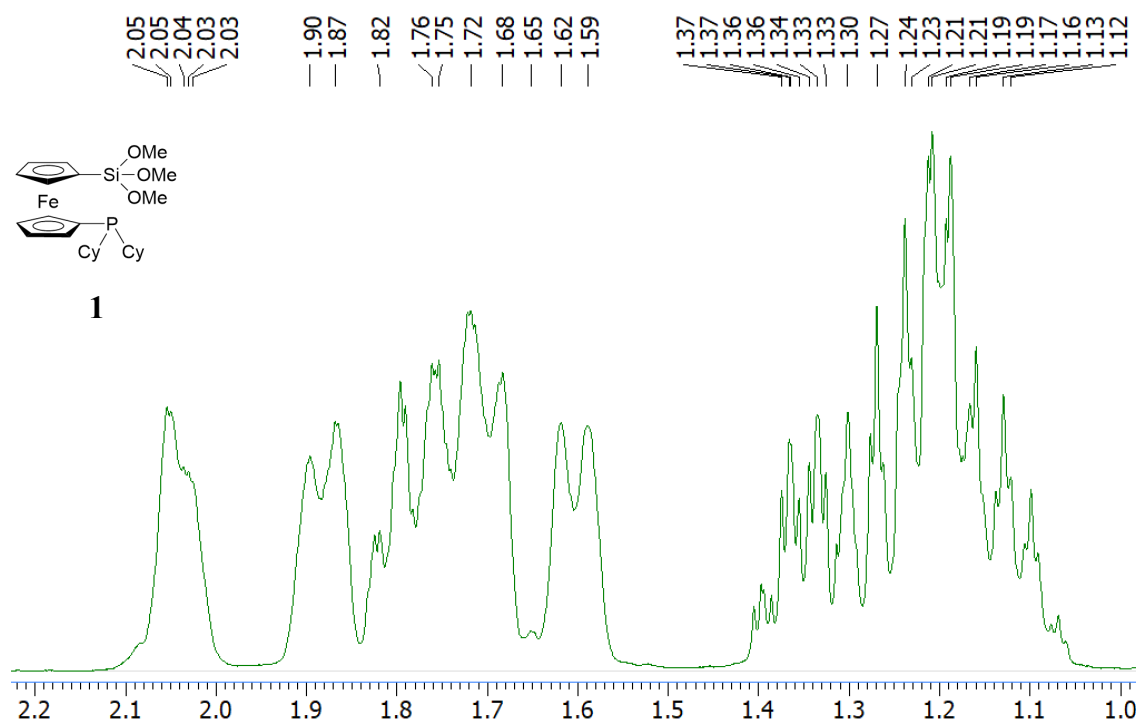

**Figure S2.** Selected region of <sup>1</sup>H NMR spectrum (400 MHz) of **1** in C<sub>6</sub>D<sub>6</sub> drawn in ppm.

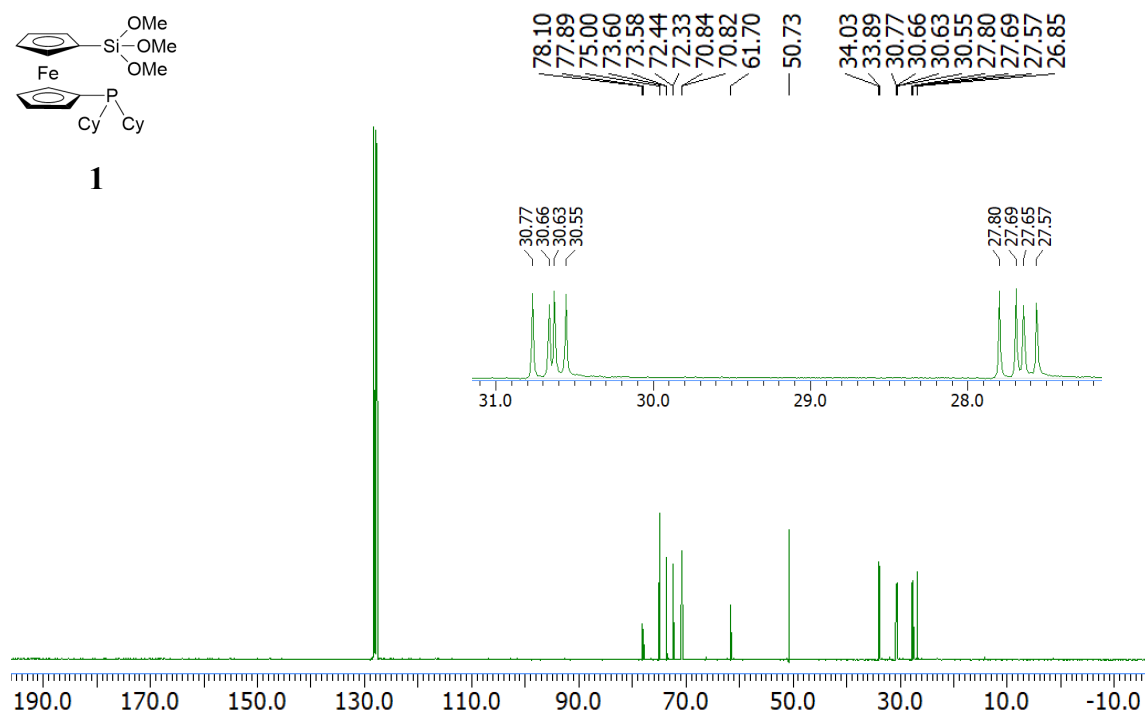

**Figure S3.**  $^{13}\text{C}\{^1\text{H}\}$  NMR spectrum (101 MHz) of **1** in  $\text{C}_6\text{D}_6$  drawn in ppm.

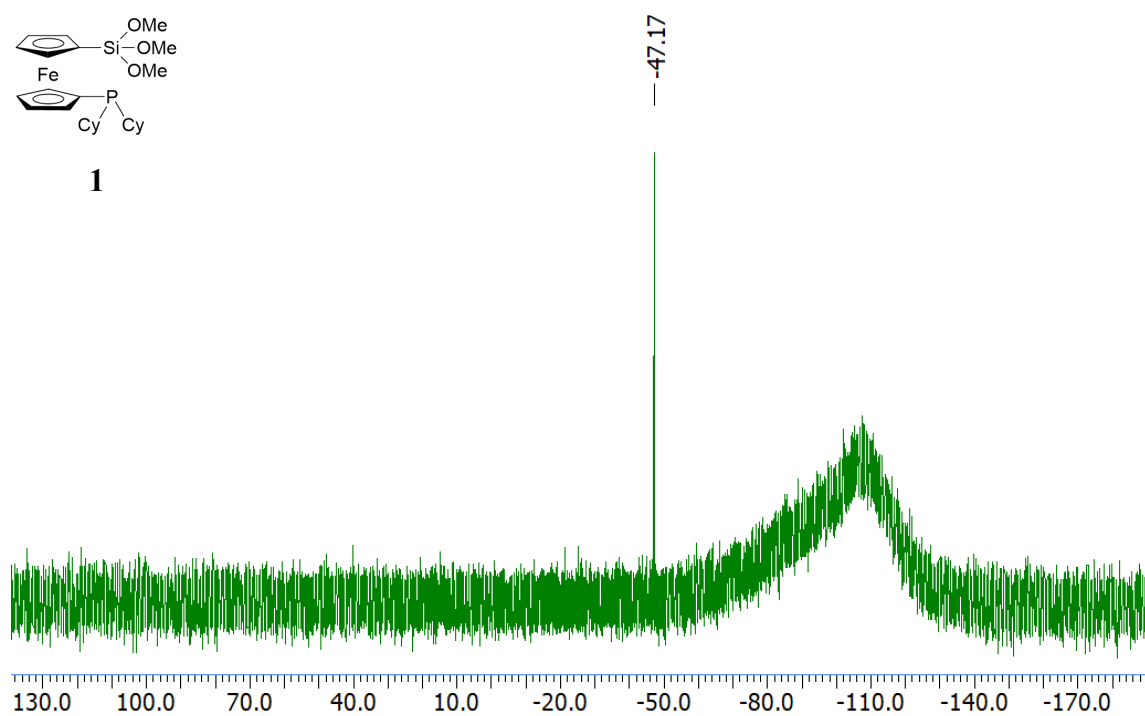

**Figure S4.**  $^{29}\text{Si}\{^1\text{H}\}$  NMR spectrum (79.5 MHz) of **1** in  $\text{C}_6\text{D}_6$  drawn in ppm.

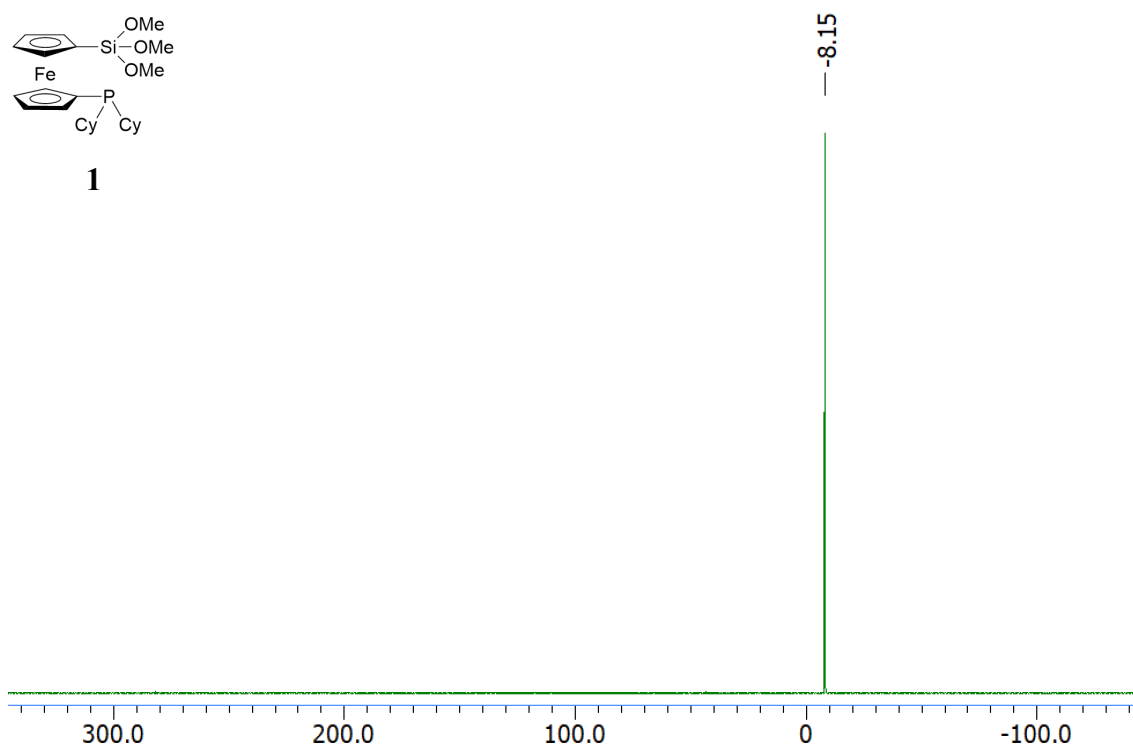

**Figure S5.**  $^{31}\text{P}\{^1\text{H}\}$  NMR spectrum (162 MHz) of **1** in  $\text{C}_6\text{D}_6$  drawn in ppm.

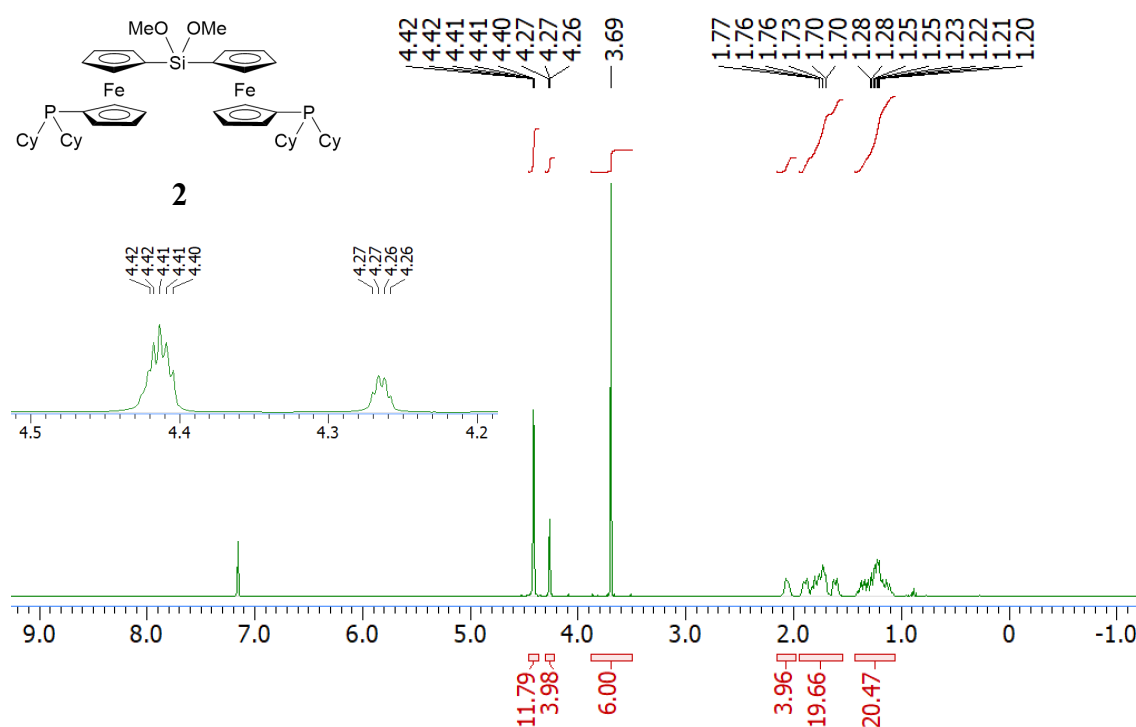

**Figure S6.**  $^1\text{H}$  NMR spectrum (400 MHz) of **2** in  $\text{C}_6\text{D}_6$  drawn in ppm.

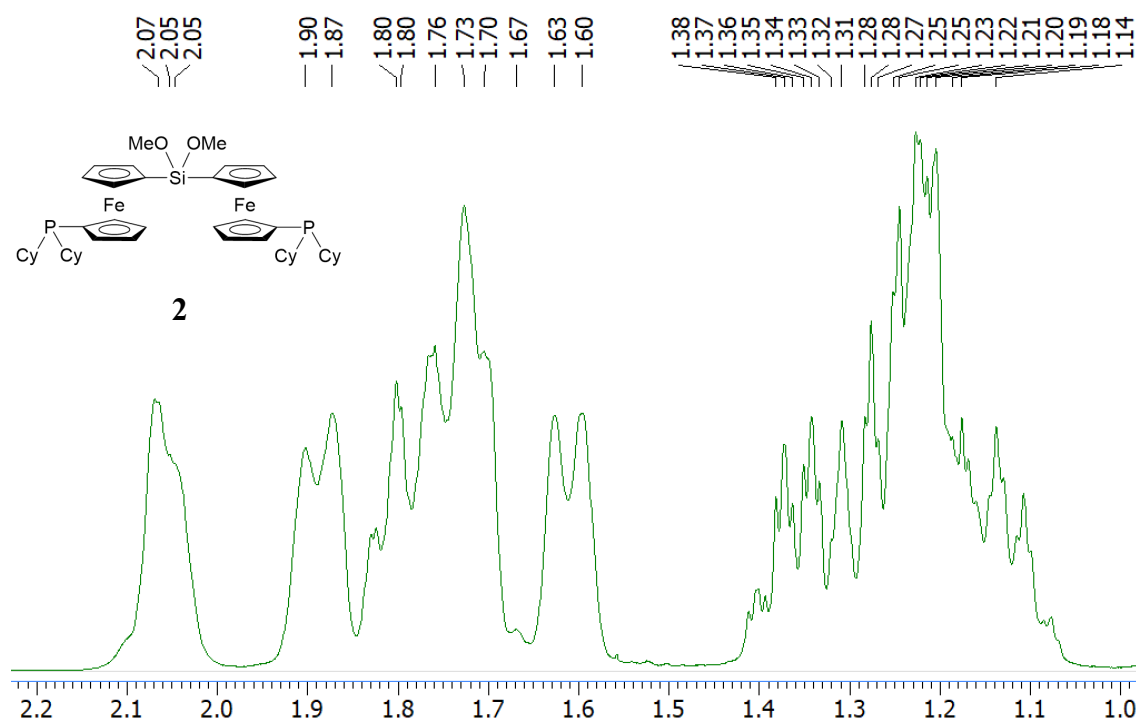

**Figure S7.** Selected region of  $^1\text{H}$  NMR spectrum (400 MHz) of **2** in  $\text{C}_6\text{D}_6$  drawn in ppm.

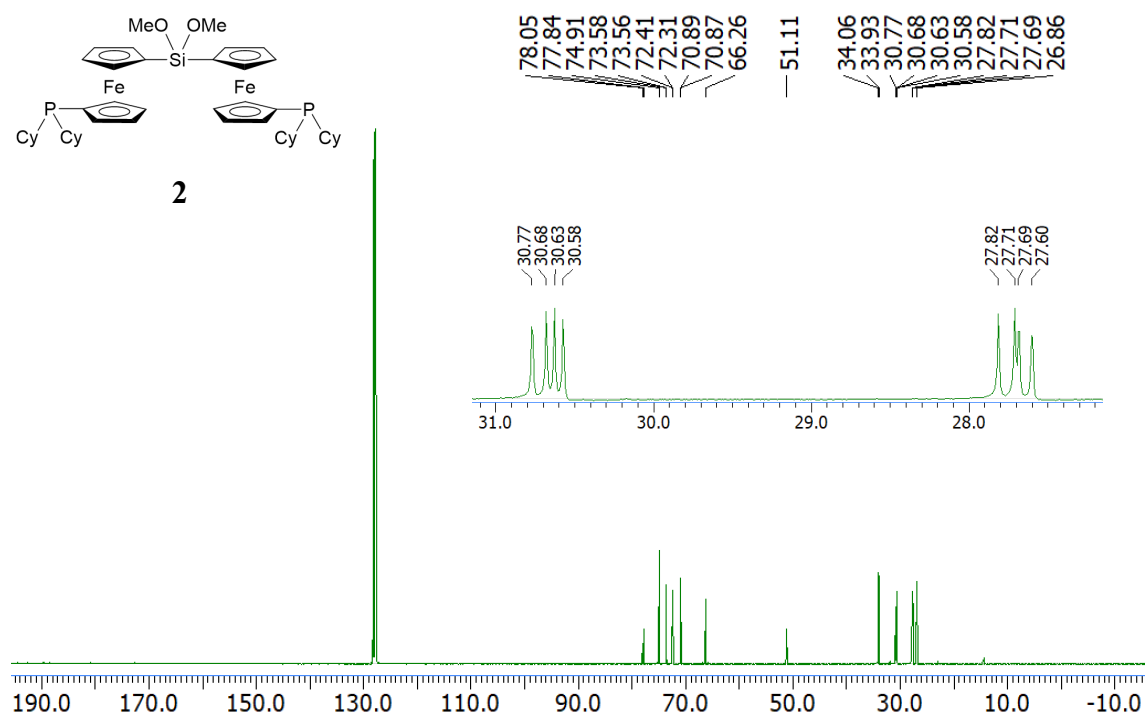

**Figure S8.**  $^{13}\text{C}\{^1\text{H}\}$  NMR spectrum (101 MHz) of **2** in C<sub>6</sub>D<sub>6</sub> drawn in ppm.

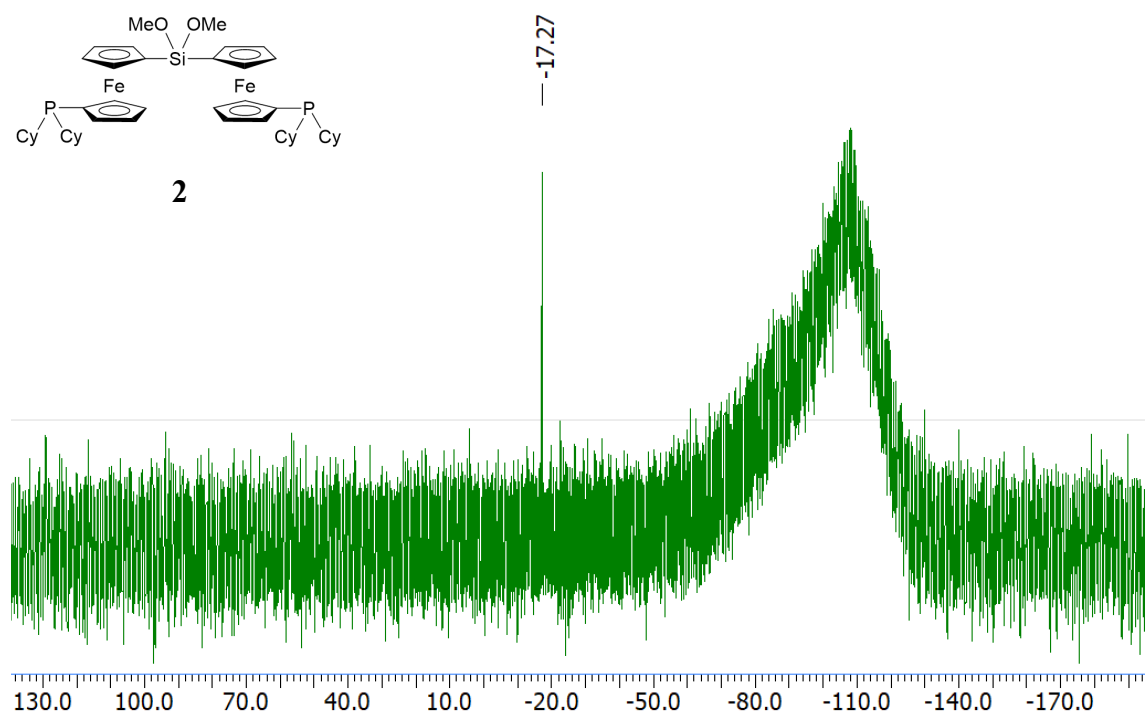

**Figure S9.**  $^{29}\text{Si}\{^1\text{H}\}$  NMR spectrum (79.5 MHz) of **2** in C<sub>6</sub>D<sub>6</sub> drawn in ppm.

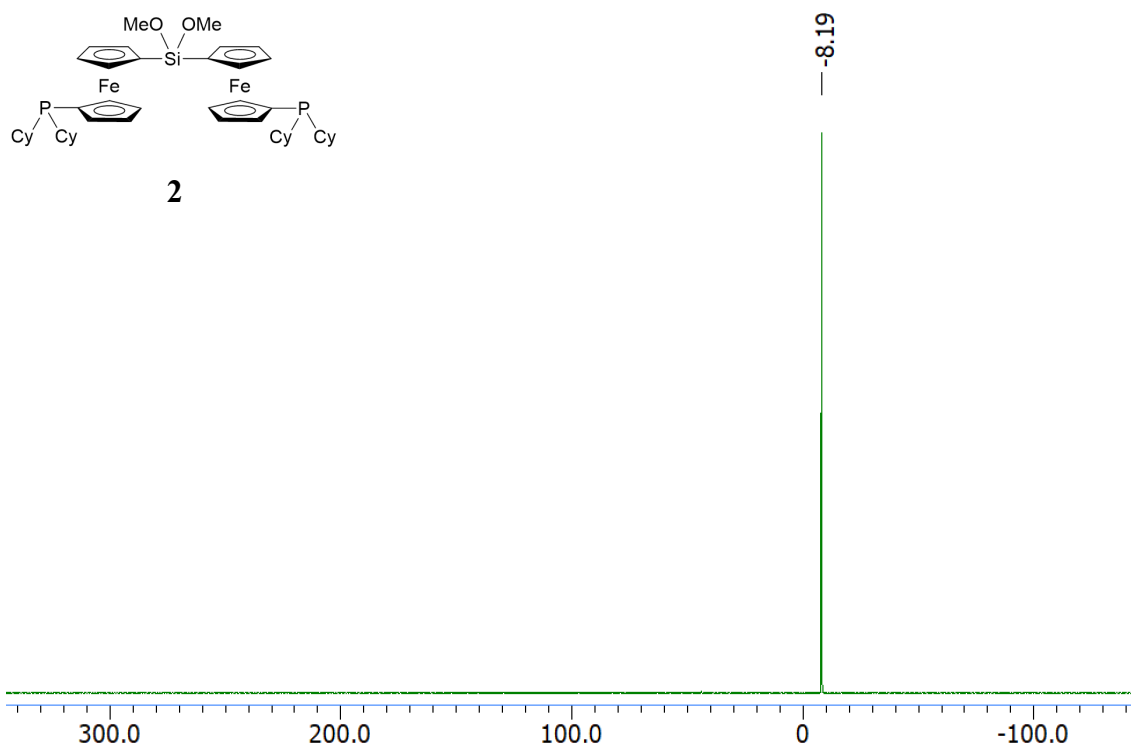

**Figure S10.**  $^{31}\text{P}\{^1\text{H}\}$  NMR spectrum (162 MHz) of **2** in  $\text{C}_6\text{D}_6$  drawn in ppm.

## 2. Crystallographic data

**Table S1.** Crystal data and structural refinement data for **1** and **2**.

| Compound                                             | <b>1</b>                                             | <b>2</b>                                                                         |
|------------------------------------------------------|------------------------------------------------------|----------------------------------------------------------------------------------|
| Formula                                              | C <sub>25</sub> H <sub>39</sub> FeO <sub>3</sub> PSi | C <sub>46</sub> H <sub>66</sub> Fe <sub>2</sub> O <sub>2</sub> P <sub>2</sub> Si |
| Molecular Weight                                     | 502.47                                               | 852.71                                                                           |
| Temperature / °C                                     | −170                                                 | −170                                                                             |
| $\lambda$ / Å                                        | 0.71073                                              | 0.71073                                                                          |
| Crystal size / mm <sup>3</sup>                       | 0.18 x 0.15 x 0.10                                   | 0.10 x 0.07 x 0.02                                                               |
| Crystal system                                       | Triclinic                                            | Monoclinic                                                                       |
| Space group                                          | <i>P</i> -1 (#2)                                     | <i>P</i> 2 <sub>1</sub> /c (#14)                                                 |
| <i>a</i> / Å                                         | 10.4839(2)                                           | 10.1549(2)                                                                       |
| <i>b</i> / Å                                         | 10.5500(2)                                           | 34.1666(7)                                                                       |
| <i>c</i> / Å                                         | 24.0736(4)                                           | 12.6691(3)                                                                       |
| $\alpha$ / °                                         | 93.5710(10)                                          | 90                                                                               |
| $\beta$ / °                                          | 96.4280(10)                                          | 104.079(2)                                                                       |
| $\gamma$ / °                                         | 111.368(2)                                           | 90                                                                               |
| <i>V</i> / Å <sup>3</sup>                            | 2448.71(8)                                           | 4263.61(16)                                                                      |
| <i>Z</i>                                             | 4                                                    | 4                                                                                |
| $\mu$ / mm <sup>−1</sup>                             | 0.755                                                | 0.820                                                                            |
| <i>D</i> <sub>calcd.</sub> / g·cm <sup>−3</sup>      | 1.363                                                | 1.328                                                                            |
| $\theta_{\text{max}}$ / °                            | 25.242                                               | 25.242                                                                           |
| Refl./restr./param.                                  | 12407/0/565                                          | 11086/0/478                                                                      |
| Completeness / %                                     | 99.6                                                 | 99.9                                                                             |
| GOF                                                  | 1.022                                                | 1.129                                                                            |
| <i>R</i> <sub>1</sub> ( <i>I</i> > 2σ( <i>I</i> ))   | 0.0311                                               | 0.0634                                                                           |
| w <i>R</i> <sub>2</sub> ( <i>I</i> > 2σ( <i>I</i> )) | 0.0791                                               | 0.1187                                                                           |
| <i>R</i> <sub>1</sub> (all data)                     | 0.0381                                               | 0.0921                                                                           |
| w <i>R</i> <sub>2</sub> (all data)                   | 0.0827                                               | 0.1284                                                                           |
| Largest diff. peak and hole / e·Å <sup>−3</sup>      | 0.641, −0.400                                        | 1.785, −0.654                                                                    |
| CCDC number                                          | 2141476                                              | 2141477                                                                          |

### 3. Coordinates of theoretically optimized structures

**Theoretical calculations:** All calculations were carried out using the density functional theory (DFT) method with a B3PW91-D3(BJ) functional,<sup>[S1,S2]</sup> and geometry optimizations and vibrational frequencies were calculated in the gas phase using the 6-311G(3d) basis sets, as implemented in the Gaussian 16 program package.<sup>[S3]</sup> Computational time was generously provided by the Supercomputer Laboratory at the Institute for Chemical Research (Kyoto University). The coordinates of the optimized structures are shown below.

**Optimized structures:** .xyz file format.

· Compound 4

70

Compound 4, electronic energy = -3096.48322997 a.u

|    |           |           |           |
|----|-----------|-----------|-----------|
| Fe | 0.867712  | -0.629374 | 0.330172  |
| C  | 2.750097  | -1.100952 | -0.263853 |
| C  | 2.283516  | -2.040438 | 0.712936  |
| H  | 2.725940  | -2.201023 | 1.685787  |
| C  | 1.109555  | -2.664382 | 0.216326  |
| H  | 0.510170  | -3.393650 | 0.742648  |
| C  | 0.835077  | -2.125024 | -1.071489 |
| H  | -0.019117 | -2.353745 | -1.691490 |
| C  | 1.838368  | -1.168632 | -1.369019 |
| H  | 1.878704  | -0.543739 | -2.249351 |
| C  | -0.923995 | 0.355929  | 0.241510  |
| C  | 0.175809  | 1.239737  | -0.008790 |
| H  | 0.358872  | 1.768411  | -0.932641 |
| C  | 1.027572  | 1.241269  | 1.127653  |
| H  | 1.962775  | 1.771777  | 1.221553  |
| C  | 0.481405  | 0.344362  | 2.084204  |
| H  | 0.928368  | 0.082557  | 3.032775  |
| C  | -0.717587 | -0.195922 | 1.545123  |
| H  | -1.345778 | -0.930919 | 2.026374  |
| Si | 4.112603  | 0.092638  | -0.069437 |
| O  | 5.586406  | -0.493895 | -0.509709 |
| C  | 5.804288  | -1.038510 | -1.793943 |
| H  | 5.117136  | -1.866683 | -1.996505 |
| H  | 6.827295  | -1.415531 | -1.836865 |
| H  | 5.676691  | -0.282271 | -2.575843 |
| O  | 3.723178  | 1.359567  | -1.039749 |
| C  | 4.577668  | 2.466743  | -1.222931 |
| H  | 4.493743  | 3.166393  | -0.384894 |
| H  | 4.281124  | 2.984584  | -2.136872 |
| H  | 5.625380  | 2.162316  | -1.320006 |
| O  | 4.281894  | 0.505526  | 1.502050  |
| C  | 5.496278  | 0.815647  | 2.152364  |

|   |           |           |           |
|---|-----------|-----------|-----------|
| H | 6.314322  | 0.187661  | 1.792858  |
| H | 5.361164  | 0.648733  | 3.222582  |
| H | 5.762683  | 1.865861  | 1.996050  |
| P | -2.273024 | 0.093942  | -0.945874 |
| C | -3.274777 | -1.208235 | -0.076326 |
| H | -3.351734 | -0.948857 | 0.987047  |
| C | -2.588012 | -2.569444 | -0.190878 |
| H | -2.455793 | -2.808662 | -1.254147 |
| H | -1.587739 | -2.518330 | 0.241553  |
| C | -3.401831 | -3.671454 | 0.477283  |
| H | -2.893344 | -4.635052 | 0.363288  |
| H | -3.457900 | -3.475339 | 1.556506  |
| C | -4.811856 | -3.740576 | -0.095614 |
| H | -5.398528 | -4.511324 | 0.415473  |
| H | -4.756298 | -4.039169 | -1.150793 |
| C | -5.506979 | -2.388599 | 0.006010  |
| H | -5.656541 | -2.138758 | 1.064815  |
| H | -6.504213 | -2.435149 | -0.444764 |
| C | -4.689690 | -1.280982 | -0.652669 |
| H | -5.205581 | -0.324975 | -0.527886 |
| H | -4.627064 | -1.462371 | -1.734102 |
| C | -3.288676 | 1.624337  | -0.607721 |
| H | -4.213493 | 1.460114  | -1.178729 |
| C | -3.650878 | 1.872183  | 0.853443  |
| H | -2.725849 | 1.979690  | 1.431920  |
| H | -4.179313 | 1.010439  | 1.271925  |
| C | -4.505583 | 3.126689  | 1.014762  |
| H | -5.473855 | 2.968317  | 0.520953  |
| H | -4.723209 | 3.299034  | 2.074638  |
| C | -3.827121 | 4.347435  | 0.404987  |
| H | -4.469434 | 5.229601  | 0.499548  |
| H | -2.909811 | 4.566945  | 0.967104  |
| C | -3.468978 | 4.101485  | -1.055928 |
| H | -2.950719 | 4.971095  | -1.474598 |
| H | -4.390679 | 3.976695  | -1.639774 |
| C | -2.604504 | 2.853938  | -1.207285 |
| H | -1.652090 | 3.019789  | -0.691335 |
| H | -2.364688 | 2.673971  | -2.260711 |

· Compound 5

119

Compound\_5, electronic energy = -5442.81267319 a.u

|    |           |           |          |
|----|-----------|-----------|----------|
| Si | -0.146577 | -1.789215 | 1.471889 |
| O  | -0.111868 | -0.497820 | 2.481711 |
| C  | -1.256447 | -0.008465 | 3.147804 |
| H  | -0.951855 | 0.835818  | 3.768558 |
| H  | -2.012300 | 0.334559  | 2.434741 |
| H  | -1.701217 | -0.775661 | 3.787381 |
| O  | -0.990893 | -2.959004 | 2.275934 |
| C  | -1.148116 | -4.258038 | 1.756303 |
| H  | -1.504045 | -4.910489 | 2.555690 |
| H  | -1.884639 | -4.269398 | 0.945815 |
| H  | -0.201276 | -4.659717 | 1.377960 |

|    |           |           |           |
|----|-----------|-----------|-----------|
| Fe | 2.944168  | -1.084381 | 0.320338  |
| C  | 1.566096  | -2.341486 | 1.126184  |
| C  | 2.012094  | -2.827614 | -0.148892 |
| H  | 1.391186  | -2.948179 | -1.025066 |
| C  | 3.412436  | -3.041038 | -0.090037 |
| H  | 4.032181  | -3.381630 | -0.906638 |
| C  | 3.857352  | -2.687267 | 1.214081  |
| H  | 4.881965  | -2.679074 | 1.557247  |
| C  | 2.727509  | -2.265301 | 1.962191  |
| H  | 2.744458  | -1.888319 | 2.974736  |
| C  | 4.325510  | 0.422033  | 0.142508  |
| C  | 3.732354  | 0.125419  | -1.125476 |
| H  | 4.259132  | -0.224961 | -2.001073 |
| C  | 2.326721  | 0.317904  | -1.029008 |
| H  | 1.597936  | 0.124228  | -1.803334 |
| C  | 2.035127  | 0.741466  | 0.295973  |
| H  | 1.057212  | 0.917679  | 0.714257  |
| C  | 3.254805  | 0.791196  | 1.018771  |
| H  | 3.357970  | 1.019864  | 2.069589  |
| P  | 6.063084  | 0.458619  | 0.668892  |
| C  | 6.920408  | -0.248111 | -0.819316 |
| H  | 6.486063  | 0.190305  | -1.726629 |
| C  | 6.711217  | -1.760912 | -0.869182 |
| H  | 7.085684  | -2.200817 | 0.064371  |
| H  | 5.644234  | -1.980642 | -0.908292 |
| C  | 7.432245  | -2.393811 | -2.053209 |
| H  | 6.991706  | -2.019031 | -2.986905 |
| H  | 7.278543  | -3.478532 | -2.051133 |
| C  | 8.919740  | -2.065390 | -2.031120 |
| H  | 9.376874  | -2.530491 | -1.147741 |
| H  | 9.422750  | -2.494525 | -2.904220 |
| C  | 9.143748  | -0.559007 | -1.976156 |
| H  | 8.779593  | -0.106373 | -2.908048 |
| H  | 10.213928 | -0.332363 | -1.919738 |
| C  | 8.413818  | 0.079852  | -0.797907 |
| H  | 8.846528  | -0.282848 | 0.144201  |
| H  | 8.570833  | 1.161965  | -0.815208 |
| C  | 6.408910  | 2.282353  | 0.458821  |
| H  | 7.494461  | 2.363819  | 0.612204  |
| C  | 6.060592  | 2.871876  | -0.904475 |
| H  | 4.986640  | 2.740674  | -1.080877 |
| H  | 6.574419  | 2.328511  | -1.703022 |
| C  | 6.414667  | 4.354695  | -0.981773 |
| H  | 7.504640  | 4.468925  | -0.908408 |
| H  | 6.125930  | 4.759307  | -1.958164 |
| C  | 5.752317  | 5.145703  | 0.139729  |
| H  | 4.662928  | 5.115856  | 0.005539  |
| H  | 6.044020  | 6.200246  | 0.088749  |
| C  | 6.102520  | 4.559964  | 1.502527  |
| H  | 5.593542  | 5.113355  | 2.299274  |
| H  | 7.179805  | 4.675850  | 1.681457  |
| C  | 5.736253  | 3.080966  | 1.576328  |
| H  | 4.649016  | 2.980993  | 1.481567  |
| H  | 6.006884  | 2.663069  | 2.551891  |

|    |            |           |           |
|----|------------|-----------|-----------|
| Fe | -2.974730  | -1.221115 | -0.467645 |
| C  | -0.960858  | -1.339294 | -0.122439 |
| C  | -1.353610  | -2.199243 | -1.200124 |
| H  | -1.253412  | -3.275505 | -1.218114 |
| C  | -1.951919  | -1.414445 | -2.223112 |
| H  | -2.388411  | -1.787694 | -3.138661 |
| C  | -1.939579  | -0.059154 | -1.798002 |
| H  | -2.375871  | 0.774173  | -2.329387 |
| C  | -1.328469  | -0.013046 | -0.517640 |
| H  | -1.186183  | 0.874300  | 0.081039  |
| C  | -4.889863  | -0.493838 | -0.384960 |
| C  | -4.855709  | -1.832192 | -0.892385 |
| H  | -5.169965  | -2.131979 | -1.881744 |
| C  | -4.282676  | -2.679595 | 0.094164  |
| H  | -4.097718  | -3.738940 | -0.012281 |
| C  | -3.938021  | -1.876994 | 1.215043  |
| H  | -3.420088  | -2.215040 | 2.100402  |
| C  | -4.313760  | -0.538501 | 0.922672  |
| H  | -4.167799  | 0.310198  | 1.573638  |
| P  | -5.587128  | 0.903123  | -1.314199 |
| C  | -7.403076  | 0.630434  | -0.977974 |
| H  | -7.883376  | 1.534014  | -1.379562 |
| C  | -7.919359  | -0.553565 | -1.797081 |
| H  | -7.424597  | -1.468869 | -1.452537 |
| H  | -7.650046  | -0.427132 | -2.851178 |
| C  | -9.427292  | -0.722547 | -1.641869 |
| H  | -9.935043  | 0.155815  | -2.061959 |
| H  | -9.770376  | -1.586809 | -2.220924 |
| C  | -9.814797  | -0.875822 | -0.175764 |
| H  | -9.383613  | -1.807415 | 0.213909  |
| H  | -10.901293 | -0.968852 | -0.073825 |
| C  | -9.300701  | 0.296134  | 0.651573  |
| H  | -9.549863  | 0.156721  | 1.709261  |
| H  | -9.810430  | 1.214751  | 0.331202  |
| C  | -7.793779  | 0.477875  | 0.488950  |
| H  | -7.462657  | 1.344337  | 1.069001  |
| H  | -7.271331  | -0.391985 | 0.904220  |
| C  | -5.211123  | 2.319104  | -0.171721 |
| H  | -5.445419  | 2.019474  | 0.857596  |
| C  | -6.063373  | 3.540981  | -0.517073 |
| H  | -5.897210  | 3.808061  | -1.569323 |
| H  | -7.127492  | 3.308237  | -0.420085 |
| C  | -5.719574  | 4.731078  | 0.374384  |
| H  | -6.323415  | 5.598771  | 0.087808  |
| H  | -5.994139  | 4.490614  | 1.410060  |
| C  | -4.235365  | 5.071606  | 0.316489  |
| H  | -4.007849  | 5.903086  | 0.991848  |
| H  | -3.982922  | 5.413927  | -0.695748 |
| C  | -3.383698  | 3.855182  | 0.657228  |
| H  | -2.318416  | 4.095738  | 0.572135  |
| H  | -3.555778  | 3.573146  | 1.704746  |
| C  | -3.726106  | 2.673827  | -0.242469 |
| H  | -3.126538  | 1.803657  | 0.025604  |
| H  | -3.470045  | 2.919753  | -1.281233 |

· Cation 4<sup>+</sup>

70

cation\_4, electronic energy = -3096.26344823 a.u

|    |           |           |           |
|----|-----------|-----------|-----------|
| Fe | 0.893741  | -0.849045 | 0.488386  |
| C  | 2.750834  | -1.165758 | -0.309296 |
| C  | 2.463116  | -2.214490 | 0.623299  |
| H  | 2.998758  | -2.393127 | 1.545031  |
| C  | 1.317208  | -2.919180 | 0.180723  |
| H  | 0.822621  | -3.722925 | 0.708649  |
| C  | 0.880005  | -2.330751 | -1.029352 |
| H  | -0.009988 | -2.598408 | -1.580628 |
| C  | 1.753099  | -1.257813 | -1.336661 |
| H  | 1.652602  | -0.581303 | -2.173189 |
| C  | -0.926337 | 0.275566  | 0.511790  |
| C  | 0.232717  | 1.108021  | 0.429076  |
| H  | 0.489575  | 1.746043  | -0.403250 |
| C  | 1.050140  | 0.884108  | 1.570172  |
| H  | 2.010679  | 1.337042  | 1.766961  |
| C  | 0.424869  | -0.123825 | 2.354479  |
| H  | 0.809426  | -0.550501 | 3.270009  |
| C  | -0.781893 | -0.496481 | 1.700355  |
| H  | -1.461246 | -1.267188 | 2.032595  |
| Si | 4.062217  | 0.135172  | -0.168566 |
| O  | 5.489654  | -0.300563 | -0.808099 |
| C  | 5.712568  | -0.572078 | -2.183013 |
| H  | 5.325502  | -1.559684 | -2.446568 |
| H  | 6.787320  | -0.557386 | -2.358988 |
| H  | 5.239833  | 0.179002  | -2.822022 |
| O  | 3.390012  | 1.395155  | -0.962375 |
| C  | 4.068044  | 2.621398  | -1.203558 |
| H  | 5.125768  | 2.459821  | -1.427489 |
| H  | 3.985890  | 3.278248  | -0.334229 |
| H  | 3.599586  | 3.106490  | -2.059537 |
| O  | 4.303429  | 0.378851  | 1.419359  |
| C  | 5.530794  | 0.748189  | 2.039877  |
| H  | 6.380414  | 0.292811  | 1.529760  |
| H  | 5.501618  | 0.401629  | 3.072448  |
| H  | 5.644648  | 1.834402  | 2.033743  |
| P  | -2.163944 | 0.134038  | -0.815133 |
| C  | -3.319131 | -1.125817 | -0.097667 |
| H  | -3.456913 | -0.926304 | 0.972630  |
| C  | -2.736388 | -2.531854 | -0.273145 |
| H  | -2.560288 | -2.703926 | -1.342944 |
| H  | -1.761108 | -2.611775 | 0.216907  |
| C  | -3.681264 | -3.602448 | 0.261870  |
| H  | -3.243920 | -4.594449 | 0.110800  |
| H  | -3.796754 | -3.474694 | 1.346171  |
| C  | -5.046453 | -3.511293 | -0.407511 |
| H  | -5.726457 | -4.258791 | 0.010816  |
| H  | -4.941671 | -3.748188 | -1.473904 |
| C  | -5.635808 | -2.115118 | -0.256306 |
| H  | -5.845499 | -1.921209 | 0.803440  |

|   |           |           |           |
|---|-----------|-----------|-----------|
| H | -6.594473 | -2.044790 | -0.778454 |
| C | -4.688487 | -1.038933 | -0.778703 |
| H | -5.133900 | -0.053681 | -0.620251 |
| H | -4.559556 | -1.154544 | -1.862983 |
| C | -3.063791 | 1.745104  | -0.570192 |
| H | -3.931302 | 1.634730  | -1.234985 |
| C | -3.559743 | 2.007298  | 0.849033  |
| H | -2.694418 | 2.084223  | 1.519965  |
| H | -4.163245 | 1.170603  | 1.212159  |
| C | -4.368997 | 3.300221  | 0.914525  |
| H | -5.285212 | 3.178624  | 0.322865  |
| H | -4.688821 | 3.486137  | 1.944431  |
| C | -3.573934 | 4.484277  | 0.378017  |
| H | -4.185095 | 5.391210  | 0.396147  |
| H | -2.717794 | 4.674190  | 1.038787  |
| C | -3.067621 | 4.215370  | -1.034096 |
| H | -2.465259 | 5.055520  | -1.392881 |
| H | -3.920043 | 4.128610  | -1.719258 |
| C | -2.248240 | 2.928814  | -1.091379 |
| H | -1.355729 | 3.059239  | -0.467700 |
| H | -1.901295 | 2.733811  | -2.111270 |

· Cation 5<sup>+</sup>

119

cation\_5, electronic energy = -5442.59683498 a.u

|    |           |           |           |
|----|-----------|-----------|-----------|
| Si | -0.258210 | -1.920870 | 1.672346  |
| O  | -0.168727 | -0.630421 | 2.670872  |
| C  | -1.304599 | -0.084604 | 3.329879  |
| H  | -0.970873 | 0.767651  | 3.921237  |
| H  | -2.049321 | 0.253190  | 2.605010  |
| H  | -1.759924 | -0.822735 | 3.992863  |
| O  | -1.035912 | -3.119177 | 2.461014  |
| C  | -1.445109 | -4.341182 | 1.879044  |
| H  | -1.944698 | -4.931122 | 2.646881  |
| H  | -2.143828 | -4.165785 | 1.057685  |
| H  | -0.587126 | -4.911097 | 1.507649  |
| Fe | 2.887002  | -1.132129 | 0.538806  |
| C  | 1.517733  | -2.430984 | 1.390964  |
| C  | 2.034285  | -2.955941 | 0.160836  |
| H  | 1.453721  | -3.135254 | -0.733171 |
| C  | 3.439778  | -3.131428 | 0.292351  |
| H  | 4.115479  | -3.483682 | -0.472829 |
| C  | 3.805857  | -2.728748 | 1.602124  |
| H  | 4.815502  | -2.664594 | 1.984747  |
| C  | 2.635476  | -2.307225 | 2.272281  |
| H  | 2.597537  | -1.877753 | 3.263830  |
| C  | 4.253367  | 0.456037  | 0.081660  |
| C  | 3.487220  | 0.101566  | -1.064179 |
| H  | 3.888841  | -0.268330 | -1.995818 |
| C  | 2.104940  | 0.252524  | -0.769049 |
| H  | 1.277408  | 0.020836  | -1.424694 |
| C  | 1.996487  | 0.706330  | 0.574900  |
| H  | 1.084098  | 0.862077  | 1.130128  |

|    |           |           |           |
|----|-----------|-----------|-----------|
| C  | 3.312575  | 0.804489  | 1.102177  |
| H  | 3.564551  | 1.052702  | 2.122673  |
| P  | 6.044364  | 0.323705  | 0.379884  |
| C  | 6.658814  | -0.188372 | -1.291749 |
| H  | 6.124850  | 0.376909  | -2.066324 |
| C  | 6.403847  | -1.683755 | -1.501464 |
| H  | 6.884913  | -2.239611 | -0.686457 |
| H  | 5.334496  | -1.899976 | -1.431978 |
| C  | 6.949305  | -2.167139 | -2.840691 |
| H  | 6.402940  | -1.672147 | -3.654225 |
| H  | 6.766172  | -3.240677 | -2.952140 |
| C  | 8.435653  | -1.861220 | -2.969719 |
| H  | 8.990137  | -2.442290 | -2.221898 |
| H  | 8.806946  | -2.179733 | -3.947993 |
| C  | 8.705795  | -0.377376 | -2.757689 |
| H  | 8.240120  | 0.196615  | -3.569084 |
| H  | 9.778878  | -0.171189 | -2.809880 |
| C  | 8.154477  | 0.114552  | -1.422619 |
| H  | 8.693778  | -0.371833 | -0.599027 |
| H  | 8.338000  | 1.187586  | -1.325559 |
| C  | 6.482721  | 2.130911  | 0.468200  |
| H  | 7.580992  | 2.105141  | 0.472186  |
| C  | 6.014585  | 2.977812  | -0.711726 |
| H  | 4.917299  | 2.977449  | -0.736840 |
| H  | 6.348901  | 2.545423  | -1.659073 |
| C  | 6.519861  | 4.413413  | -0.588027 |
| H  | 7.614314  | 4.414744  | -0.668971 |
| H  | 6.147529  | 5.011572  | -1.425459 |
| C  | 6.110902  | 5.037955  | 0.740410  |
| H  | 5.018012  | 5.139739  | 0.771025  |
| H  | 6.517790  | 6.049787  | 0.825151  |
| C  | 6.567695  | 4.183196  | 1.916614  |
| H  | 6.233962  | 4.620943  | 2.862354  |
| H  | 7.664069  | 4.163678  | 1.952255  |
| C  | 6.046348  | 2.753965  | 1.794453  |
| H  | 4.951251  | 2.781314  | 1.841268  |
| H  | 6.388697  | 2.141795  | 2.635040  |
| Fe | -2.950637 | -1.270074 | -0.364775 |
| C  | -0.967276 | -1.472138 | 0.048525  |
| C  | -1.349658 | -2.314397 | -1.051458 |
| H  | -1.293871 | -3.393873 | -1.075338 |
| C  | -1.874340 | -1.498810 | -2.089744 |
| H  | -2.290283 | -1.850245 | -3.022950 |
| C  | -1.827525 | -0.146399 | -1.657708 |
| H  | -2.219113 | 0.703003  | -2.198368 |
| C  | -1.271360 | -0.125491 | -0.352252 |
| H  | -1.131063 | 0.754418  | 0.257974  |
| C  | -4.828775 | -0.434859 | -0.386565 |
| C  | -4.841902 | -1.776357 | -0.883670 |
| H  | -5.119912 | -2.066519 | -1.886305 |
| C  | -4.372497 | -2.648238 | 0.134524  |
| H  | -4.255872 | -3.718736 | 0.044373  |
| C  | -4.042508 | -1.857073 | 1.267595  |
| H  | -3.618193 | -2.217293 | 2.193719  |

|   |            |           |           |
|---|------------|-----------|-----------|
| C | -4.325126  | -0.501646 | 0.948204  |
| H | -4.172020  | 0.343186  | 1.602637  |
| P | -5.378791  | 0.995938  | -1.370544 |
| C | -7.224623  | 0.803173  | -1.196574 |
| H | -7.619686  | 1.730333  | -1.634799 |
| C | -7.730175  | -0.350918 | -2.064049 |
| H | -7.325993  | -1.294080 | -1.678425 |
| H | -7.361057  | -0.242699 | -3.089448 |
| C | -9.253706  | -0.429428 | -2.043880 |
| H | -9.667892  | 0.476835  | -2.504214 |
| H | -9.593096  | -1.271578 | -2.655704 |
| C | -9.778657  | -0.559065 | -0.619097 |
| H | -9.443102  | -1.515806 | -0.197480 |
| H | -10.872844 | -0.585103 | -0.615729 |
| C | -9.272024  | 0.579456  | 0.257744  |
| H | -9.620419  | 0.454369  | 1.288310  |
| H | -9.695603  | 1.527194  | -0.099661 |
| C | -7.748469  | 0.672657  | 0.230482  |
| H | -7.420237  | 1.517382  | 0.843213  |
| H | -7.317424  | -0.227998 | 0.684280  |
| C | -5.032534  | 2.391760  | -0.194716 |
| H | -5.359841  | 2.102649  | 0.811882  |
| C | -5.804497  | 3.647725  | -0.603590 |
| H | -5.547319  | 3.906159  | -1.639392 |
| H | -6.880882  | 3.458406  | -0.588879 |
| C | -5.482874  | 4.823650  | 0.314152  |
| H | -6.026148  | 5.713785  | -0.018190 |
| H | -5.847793  | 4.597490  | 1.324550  |
| C | -3.986529  | 5.104348  | 0.372087  |
| H | -3.778820  | 5.925917  | 1.064868  |
| H | -3.641892  | 5.435081  | -0.616306 |
| C | -3.214186  | 3.855007  | 0.776819  |
| H | -2.136232  | 4.053232  | 0.775402  |
| H | -3.479552  | 3.582288  | 1.807207  |
| C | -3.533227  | 2.686905  | -0.149136 |
| H | -2.991193  | 1.793316  | 0.164047  |
| H | -3.188371  | 2.921334  | -1.164716 |

· Dication **5<sup>2+</sup>(singlet)**

119

Singletdication\_5, electronic energy = -5442.26146074 a.u

|    |           |           |          |
|----|-----------|-----------|----------|
| Si | 0.093231  | -0.699458 | 1.830276 |
| O  | 0.160728  | 0.894328  | 2.173677 |
| C  | -0.945572 | 1.603242  | 2.738887 |
| H  | -0.682733 | 2.659295  | 2.770187 |
| H  | -1.840824 | 1.473159  | 2.127014 |
| H  | -1.143972 | 1.251280  | 3.751910 |
| O  | -0.298406 | -1.537746 | 3.159491 |
| C  | -0.836725 | -2.847703 | 3.250291 |
| H  | -1.298770 | -2.953510 | 4.230620 |
| H  | -1.591159 | -3.012694 | 2.479843 |
| H  | -0.043614 | -3.593572 | 3.154919 |
| Fe | 3.195323  | -0.398742 | 0.030313 |

|    |           |           |           |
|----|-----------|-----------|-----------|
| C  | 1.895201  | -1.151877 | 1.471093  |
| C  | 2.272735  | -2.178617 | 0.540279  |
| H  | 1.586941  | -2.685028 | -0.125038 |
| C  | 3.665080  | -2.355089 | 0.574842  |
| H  | 4.238345  | -3.058217 | -0.006754 |
| C  | 4.184252  | -1.440175 | 1.553362  |
| H  | 5.218465  | -1.372660 | 1.863685  |
| C  | 3.098049  | -0.700214 | 2.085403  |
| H  | 3.164196  | 0.086824  | 2.821870  |
| C  | 3.928309  | 0.941842  | -1.259337 |
| C  | 3.152184  | -0.032678 | -2.003666 |
| H  | 3.534914  | -0.718064 | -2.744565 |
| C  | 1.832448  | 0.043165  | -1.528647 |
| H  | 1.001705  | -0.585339 | -1.819248 |
| C  | 1.760563  | 1.057427  | -0.528256 |
| H  | 0.891990  | 1.304166  | 0.063143  |
| C  | 3.029905  | 1.626511  | -0.358990 |
| H  | 3.297707  | 2.394081  | 0.348720  |
| P  | 5.333876  | 0.261670  | -0.487039 |
| C  | 6.411366  | -0.664597 | -1.661181 |
| H  | 6.182453  | -0.182434 | -2.621306 |
| C  | 6.080984  | -2.156514 | -1.768109 |
| H  | 6.291439  | -2.634999 | -0.804268 |
| H  | 5.019592  | -2.304853 | -1.980376 |
| C  | 6.934353  | -2.807803 | -2.852801 |
| H  | 6.666184  | -2.379369 | -3.826320 |
| H  | 6.693566  | -3.872671 | -2.905893 |
| C  | 8.419499  | -2.601085 | -2.589463 |
| H  | 8.707242  | -3.135190 | -1.675652 |
| H  | 9.009155  | -3.036223 | -3.399378 |
| C  | 8.746705  | -1.122583 | -2.440141 |
| H  | 8.575237  | -0.604493 | -3.391340 |
| H  | 9.802800  | -0.980478 | -2.197361 |
| C  | 7.901028  | -0.459262 | -1.353088 |
| H  | 8.137858  | -0.908829 | -0.381239 |
| H  | 8.151213  | 0.601994  | -1.292695 |
| C  | 6.262964  | 1.414949  | 0.571447  |
| H  | 7.220330  | 0.897727  | 0.709131  |
| C  | 6.517280  | 2.705048  | -0.236756 |
| H  | 5.560561  | 3.209111  | -0.410686 |
| H  | 6.932783  | 2.476184  | -1.222925 |
| C  | 7.453505  | 3.622218  | 0.544341  |
| H  | 8.436996  | 3.145329  | 0.632312  |
| H  | 7.604296  | 4.541469  | -0.027811 |
| C  | 6.898866  | 3.928542  | 1.928727  |
| H  | 5.969925  | 4.504282  | 1.831304  |
| H  | 7.596541  | 4.562886  | 2.480108  |
| C  | 6.628344  | 2.650166  | 2.711243  |
| H  | 6.195875  | 2.878248  | 3.688675  |
| H  | 7.573562  | 2.128797  | 2.904840  |
| C  | 5.687978  | 1.710133  | 1.957913  |
| H  | 4.700962  | 2.172632  | 1.871788  |
| H  | 5.559019  | 0.785632  | 2.524779  |
| Fe | -2.867541 | -1.203034 | 0.178693  |

|   |            |           |           |
|---|------------|-----------|-----------|
| C | -0.846728  | -1.042361 | 0.313308  |
| C | -1.222734  | -2.306943 | -0.267420 |
| H | -1.018737  | -3.285000 | 0.146772  |
| C | -1.967429  | -2.058647 | -1.451383 |
| H | -2.427938  | -2.808694 | -2.077944 |
| C | -2.070837  | -0.652940 | -1.627934 |
| H | -2.643482  | -0.154315 | -2.396734 |
| C | -1.391577  | -0.024881 | -0.552618 |
| H | -1.332095  | 1.041247  | -0.388134 |
| C | -4.837963  | -0.611408 | 0.067768  |
| C | -4.717719  | -2.031632 | 0.189758  |
| H | -5.043542  | -2.750508 | -0.547196 |
| C | -4.050398  | -2.335584 | 1.405321  |
| H | -3.813174  | -3.327220 | 1.763254  |
| C | -3.728128  | -1.107239 | 2.041905  |
| H | -3.198057  | -0.992262 | 2.976919  |
| C | -4.209880  | -0.052169 | 1.221960  |
| H | -4.114380  | 1.002224  | 1.433148  |
| P | -5.631879  | 0.209275  | -1.352406 |
| C | -7.420877  | -0.109977 | -0.954667 |
| H | -7.951874  | 0.513057  | -1.687438 |
| C | -7.799209  | -1.562671 | -1.248678 |
| H | -7.266492  | -2.222657 | -0.554069 |
| H | -7.483674  | -1.840180 | -2.259876 |
| C | -9.298806  | -1.781799 | -1.070739 |
| H | -9.840628  | -1.186972 | -1.816748 |
| H | -9.548382  | -2.828921 | -1.267996 |
| C | -9.751434  | -1.378618 | 0.327395  |
| H | -9.284229  | -2.045141 | 1.064394  |
| H | -10.832213 | -1.512100 | 0.430996  |
| C | -9.364251  | 0.062052  | 0.637530  |
| H | -9.655340  | 0.327076  | 1.658880  |
| H | -9.917319  | 0.737776  | -0.027314 |
| C | -7.866809  | 0.292855  | 0.448475  |
| H | -7.625378  | 1.341186  | 0.647492  |
| H | -7.308890  | -0.302178 | 1.182202  |
| C | -5.432090  | 1.996720  | -0.891834 |
| H | -5.657262  | 2.117927  | 0.175357  |
| C | -6.406196  | 2.870259  | -1.685950 |
| H | -6.249854  | 2.700375  | -2.759362 |
| H | -7.438761  | 2.583694  | -1.472787 |
| C | -6.214203  | 4.349694  | -1.365768 |
| H | -6.902661  | 4.950460  | -1.967205 |
| H | -6.485339  | 4.526175  | -0.316951 |
| C | -4.776840  | 4.798016  | -1.596817 |
| H | -4.656998  | 5.850637  | -1.323633 |
| H | -4.541490  | 4.724653  | -2.666360 |
| C | -3.803264  | 3.928701  | -0.810791 |
| H | -2.769280  | 4.230440  | -1.015155 |
| H | -3.966579  | 4.081913  | 0.264499  |
| C | -3.993730  | 2.452637  | -1.142116 |
| H | -3.303364  | 1.839228  | -0.558873 |
| H | -3.748671  | 2.280689  | -2.198435 |

· Dication **5<sup>2+</sup>(triplet)**

119

Triplet dication\_5, electronic energy = -5442.29812254 a.u

|    |           |           |           |
|----|-----------|-----------|-----------|
| Si | -0.082664 | -1.526187 | 1.276294  |
| O  | 0.165400  | -0.081600 | 1.996167  |
| C  | -0.801973 | 0.617029  | 2.767399  |
| H  | -0.314500 | 1.480795  | 3.216472  |
| H  | -1.625240 | 0.966981  | 2.137780  |
| H  | -1.203752 | -0.013147 | 3.564002  |
| O  | -0.860509 | -2.614429 | 2.208063  |
| C  | -0.282143 | -3.284670 | 3.326544  |
| H  | -0.034639 | -2.577206 | 4.121345  |
| H  | -1.014274 | -3.996852 | 3.702654  |
| H  | 0.618681  | -3.828012 | 3.032014  |
| Fe | 3.047733  | -1.022667 | -0.116549 |
| C  | 1.604418  | -2.138311 | 0.819448  |
| C  | 1.991277  | -2.779738 | -0.404313 |
| H  | 1.352606  | -2.946117 | -1.260479 |
| C  | 3.367914  | -3.113157 | -0.329086 |
| H  | 3.958206  | -3.557529 | -1.118056 |
| C  | 3.851289  | -2.699279 | 0.933145  |
| H  | 4.880453  | -2.739571 | 1.262090  |
| C  | 2.783962  | -2.096997 | 1.638869  |
| H  | 2.858595  | -1.636794 | 2.614067  |
| C  | 4.535047  | 0.513301  | -0.278120 |
| C  | 4.115844  | 0.055201  | -1.561558 |
| H  | 4.756943  | -0.397368 | -2.303261 |
| C  | 2.713257  | 0.249385  | -1.693597 |
| H  | 2.117368  | -0.012139 | -2.556627 |
| C  | 2.240311  | 0.819654  | -0.479821 |
| H  | 1.218725  | 1.062696  | -0.232194 |
| C  | 3.351332  | 0.952369  | 0.396381  |
| H  | 3.304110  | 1.283219  | 1.423109  |
| P  | 6.146303  | 0.327537  | 0.536549  |
| C  | 7.197813  | -0.317622 | -0.843132 |
| H  | 6.935339  | 0.201826  | -1.773764 |
| C  | 6.957938  | -1.821103 | -1.018654 |
| H  | 7.182519  | -2.322277 | -0.068343 |
| H  | 5.903451  | -2.023612 | -1.232587 |
| C  | 7.839384  | -2.403773 | -2.118351 |
| H  | 7.562362  | -1.955022 | -3.081209 |
| H  | 7.655862  | -3.478676 | -2.211812 |
| C  | 9.312109  | -2.134650 | -1.836949 |
| H  | 9.612039  | -2.678703 | -0.932579 |
| H  | 9.930882  | -2.522136 | -2.650663 |
| C  | 9.567889  | -0.646390 | -1.640375 |
| H  | 9.377791  | -0.115360 | -2.581716 |
| H  | 10.617584 | -0.467281 | -1.392044 |
| C  | 8.678942  | -0.055454 | -0.549695 |
| H  | 8.938800  | -0.499294 | 0.420318  |
| H  | 8.870080  | 1.016981  | -0.465034 |
| C  | 6.644150  | 2.110310  | 0.714001  |
| H  | 7.684604  | 2.023267  | 1.054909  |
| C  | 6.613304  | 2.917884  | -0.581027 |

|    |            |           |           |
|----|------------|-----------|-----------|
| H  | 5.576225   | 2.980983  | -0.936208 |
| H  | 7.184292   | 2.417502  | -1.367969 |
| C  | 7.160242   | 4.325072  | -0.352468 |
| H  | 8.224648   | 4.256690  | -0.095846 |
| H  | 7.103717   | 4.899067  | -1.282101 |
| C  | 6.413397   | 5.039882  | 0.766908  |
| H  | 5.373726   | 5.210714  | 0.457180  |
| H  | 6.848955   | 6.027337  | 0.941961  |
| C  | 6.426939   | 4.221821  | 2.052742  |
| H  | 5.852901   | 4.725849  | 2.835876  |
| H  | 7.454948   | 4.139423  | 2.425773  |
| C  | 5.866883   | 2.820103  | 1.822342  |
| H  | 4.814334   | 2.913892  | 1.527708  |
| H  | 5.894049   | 2.233832  | 2.746494  |
| Fe | -3.209064  | -1.246239 | -0.196271 |
| C  | -1.141157  | -1.345621 | -0.233083 |
| C  | -1.722952  | -2.405526 | -1.006935 |
| H  | -1.639905  | -3.461467 | -0.789983 |
| C  | -2.469648  | -1.834924 | -2.074540 |
| H  | -3.059475  | -2.375237 | -2.801660 |
| C  | -2.358930  | -0.427578 | -1.980586 |
| H  | -2.887898  | 0.287967  | -2.594996 |
| C  | -1.555067  | -0.124538 | -0.858744 |
| H  | -1.335627  | 0.871526  | -0.500908 |
| C  | -5.201182  | -0.512850 | 0.090013  |
| C  | -5.153142  | -1.935039 | -0.074369 |
| H  | -5.616863  | -2.482595 | -0.881750 |
| C  | -4.350457  | -2.496361 | 0.954646  |
| H  | -4.120019  | -3.543971 | 1.084429  |
| C  | -3.853495  | -1.424794 | 1.745156  |
| H  | -3.175393  | -1.520390 | 2.579376  |
| C  | -4.370139  | -0.213688 | 1.208406  |
| H  | -4.154330  | 0.778218  | 1.575517  |
| P  | -5.930911  | 0.618491  | -1.124652 |
| C  | -7.742635  | 0.311012  | -0.846548 |
| H  | -8.204851  | 1.102360  | -1.452035 |
| C  | -8.195904  | -1.026063 | -1.433175 |
| H  | -7.741899  | -1.847406 | -0.865473 |
| H  | -7.860879  | -1.124199 | -2.470699 |
| C  | -9.713936  | -1.160963 | -1.338487 |
| H  | -10.181385 | -0.393861 | -1.967731 |
| H  | -10.024633 | -2.127483 | -1.745444 |
| C  | -10.192727 | -1.005756 | 0.099927  |
| H  | -9.808140  | -1.839565 | 0.701809  |
| H  | -11.283103 | -1.071095 | 0.144745  |
| C  | -9.718936  | 0.310952  | 0.702899  |
| H  | -10.027928 | 0.389683  | 1.749368  |
| H  | -10.195392 | 1.146977  | 0.175912  |
| C  | -8.202428  | 0.460076  | 0.601603  |
| H  | -7.892671  | 1.424550  | 1.014171  |
| H  | -7.716567  | -0.313776 | 1.210320  |
| C  | -5.603877  | 2.265401  | -0.345580 |
| H  | -5.770809  | 2.193540  | 0.736920  |
| C  | -6.560918  | 3.321836  | -0.907554 |

|   |           |          |           |
|---|-----------|----------|-----------|
| H | -6.465664 | 3.350694 | -2.000896 |
| H | -7.597646 | 3.054640 | -0.690356 |
| C | -6.258226 | 4.700441 | -0.327539 |
| H | -6.937171 | 5.437733 | -0.764401 |
| H | -6.467277 | 4.687949 | 0.749628  |
| C | -4.809123 | 5.108369 | -0.558219 |
| H | -4.609741 | 6.079235 | -0.096672 |
| H | -4.632588 | 5.233463 | -1.633888 |
| C | -3.851427 | 4.056228 | -0.013135 |
| H | -2.813887 | 4.335097 | -0.224983 |
| H | -3.945387 | 4.007600 | 1.079782  |
| C | -4.152821 | 2.684028 | -0.606246 |
| H | -3.457423 | 1.937595 | -0.208618 |
| H | -3.988316 | 2.711186 | -1.691057 |

#### 4. References

- [S1] Tao, J.; Perdew, J. P.; Staroverov, V. N.; Scuseria, G. E. *Phys. Rev. Lett.* **2003**, *91*, 146401.
- [S2] Grimme, S.; Ehrlich, S.; Goerigk, L. *J. Comp. Chem.* **2011**, *32*, 1456-1465.
- [S3] Gaussian 16, Revision C.01, Frisch, M. J.; Trucks, G. W.; Schlegel, H. B.; Scuseria, G. E.; Robb, M. A.; Cheeseman, J. R.; Scalmani, G.; Barone, V.; Petersson, G. A.; Nakatsuji, H.; Li, X.; Caricato, M.; Marenich, A. V.; Bloino, J.; Janesko, B. G.; Gomperts, R.; Mennucci, B.; Hratchian, H. P.; Ortiz, J. V.; Izmaylov, A. F.; Sonnenberg, J. L.; Williams-Young, D.; Ding, F.; Lipparini, F.; Egidi, F.; Goings, J.; Peng, B.; Petrone, A.; Henderson, T.; Ranasinghe, D.; Zakrzewski, V. G.; Gao, J.; Rega, N.; Zheng, G.; Liang, W.; Hada, M.; Ehara, M.; Toyota, K.; Fukuda, R.; Hasegawa, J.; Ishida, M.; Nakajima, T.; Honda, Y.; Kitao, O.; Nakai, H.; Vreven, T.; Throssell, K.; Montgomery, J. A., Jr.; Peralta, J. E.; Ogliaro, F.; Bearpark, M. J.; Heyd, J. J.; Brothers, E. N.; Kudin, K. N.; Staroverov, V. N.; Keith, T. A.; Kobayashi, R.; Normand, J.; Raghavachari, K.; Rendell, A. P.; Burant, J. C.; Iyengar, S. S.; Tomasi, J.; Cossi, M.; Millam, J. M.; Klene, M.; Adamo, C.; Cammi, R.; Ochterski, J. W.; Martin, R. L.; Morokuma, K.; Farkas, O.; Foresman, J. B.; Fox, D. J. Gaussian, Inc., Wallingford CT, 2016.
